# Supplementary material for: The RNA Helicase DDX6 Associates with RIG-I to Augment Induction of Antiviral Signaling
Source: Int J Mol Sci. 2018 Jun 26;19(7):1877. doi: 10.3390/ijms19071877 (PMC6073104; doi:10.3390/ijms19071877)
Supplement: Supplementary file 1 [file ijms-19-01877-s001.zip › Supplementary Table 1.xlsx]

## Sheet: WT vs mock
SILAC AP-MS/MS Influenza B virus WT vs non-infected (mock)
UniProt Accession Number	Description	Score Replicate 1	Score Replikate 2	Coverage Replicate 1	Coverage Replicate 2	# Unique Peptides Replicate 1	# Unique Peptides Replicate 2	Ratio WT/ mock infection replicate 1	Ratio WT/ mock infection replicate 2
Q8WXD0	relaxin receptor 2 isoform 2 [Homo sapiens]	2.19811		2.05		1		458.716
P60174	triosephosphate isomerase isoform 1 [Homo sapiens]	6.37817		10.44		2		54.9867
P23434	glycine cleavage system H protein, mitochondrial precursor [Homo sapiens]	5.34505	6.19907	17.34	15.61	2	2	9.62868	1.25275
P62269	40S ribosomal protein S18 [Homo sapiens]	9.14227		13.82		3		8.6592
P58546	myotrophin [Homo sapiens]	4.75756		14.41		1		7.89293
O95400	CD2 antigen cytoplasmic tail-binding protein 2 [Homo sapiens]	2.2977	2.50826	3.23	4.11	1	1	7.56005	0.711961
P05455	lupus La protein [Homo sapiens]	7.14663	2.05896	6.86	3.19	2	1	7.39754	1.21697
P62258	14-3-3 protein epsilon [Homo sapiens]	4.40901		4.31		1		7.25982
	poly(rC)-binding protein 1 [Homo sapiens]	2.14433		3.65		1		6.9052
Q9Y281	cofilin-2 isoform 2 [Homo sapiens]	5.04146		7.38		1		6.80404
P62899	60S ribosomal protein L31 isoform 1 [Homo sapiens]	6.90587		33.6		3		6.63573
P07814	bifunctional glutamate/proline--tRNA ligase [Homo sapiens]	6.65782		2.91		2		6.48221
O43175	D-3-phosphoglycerate dehydrogenase [Homo sapiens]	23.5608	6.40886	10.69	4.88	5	2	6.38856	0.978053
P25398	40S ribosomal protein S12 [Homo sapiens]	14.1519	2.20205	24.24	7.58	4	1	6.36598	1.2494
P46782	40S ribosomal protein S5 [Homo sapiens]	5.55107		8.33		2		6.36109
Q9UBQ5	eukaryotic translation initiation factor 3 subunit K [Homo sapiens]	2.38261		6.88		1		6.30063
P39019	40S ribosomal protein S19 [Homo sapiens]	3.61172		12.41		2		6.28621
P35268	60S ribosomal protein L22 proprotein [Homo sapiens]	5.85579		21.88		2		6.22352
P49368	T-complex protein 1 subunit gamma isoform c [Homo sapiens]	8.02268	8.50415	2.17	2.17	1	1	6.22125	1.05476
O60783	28S ribosomal protein S14, mitochondrial [Homo sapiens]	2.22504		11.72		1		6.1445
Q9H7Z7	prostaglandin E synthase 2 isoform 2 [Homo sapiens]	6.33165		12.9		2		6.14282
Q16718	NADH dehydrogenase [ubiquinone] 1 alpha subcomplex subunit 5 [Homo sapiens]	2.11354		8.62		1		6.09729
Q9NX70	mediator of RNA polymerase II transcription subunit 29 [Homo sapiens]	5.3511	2.14041	7.69	7.69	1	1	5.93636	0.810119
Q9BSG0	protease-associated domain-containing protein 1 precursor [Homo sapiens]	4.69066		6.38		1		5.9176
Q9NQE9	histidine triad nucleotide-binding protein 3 [Homo sapiens]	4.20085		5.49		1		5.86716
P49321	nuclear autoantigenic sperm protein isoform 3 [Homo sapiens]	2.14616		1.78		1		5.86456
P62750	60S ribosomal protein L23a [Homo sapiens]	19.1905	22.5138	10.9	10.9	2	2	5.85734	1.1085
P60866	40S ribosomal protein S20 isoform 2 [Homo sapiens]	22.6576		22.69		3		5.85074
P46783	40S ribosomal protein S10 [Homo sapiens]	8.50247	2.81289	20	14.55	3	2	5.81918	0.213191
P55327	tumor protein D52 isoform 3 [Homo sapiens]	17.6665	8.67386	27.72	27.17	2	2	5.77348	0.989567
P18621	60S ribosomal protein L17 isoform a [Homo sapiens]	4.97546		15.22		3		5.75684
Q8NC51	plasminogen activator inhibitor 1 RNA-binding protein isoform 4 [Homo sapiens]	2.95532	10.5509	5.43	5.43	1	2	5.74308	0.973253
P55010	eukaryotic translation initiation factor 5 [Homo sapiens]	3.67882	135.033	2.32	31.17	1	3	5.71693	1.06043
P62191	26S protease regulatory subunit 4 [Homo sapiens]	6.53054	6.86753	4.77	2.73	2	1	5.68519	1.01269
Q04837	single-stranded DNA-binding protein, mitochondrial precursor [Homo sapiens]	26.4324	2.30123	29.73	10.14	4	1	5.68175	1.20362
Q9UHV9	prefoldin subunit 2 [Homo sapiens]	13.406	2.05831	22.73	9.09	3	1	5.67792	1.00557
P10599	thioredoxin isoform 2 [Homo sapiens]	6.08642		21.18		2		5.65528
O95816	BAG family molecular chaperone regulator 2 [Homo sapiens]	2.69578		5.21		1		5.62457
P62857	40S ribosomal protein S28 [Homo sapiens]	12.0927	2.33479	47.83	17.39	4	1	5.58727	1.11373
P51665	26S proteasome non-ATPase regulatory subunit 7 [Homo sapiens]	5.06486		4.01		1		5.58157
Q9Y237	peptidyl-prolyl cis-trans isomerase NIMA-interacting 4 isoform 2 [Homo sapiens]	2.24005		10.53		1		5.56385
Q9BYN8	28S ribosomal protein S26, mitochondrial [Homo sapiens]	3.5635		7.32		2		5.5406
Q8TF09	dynein light chain roadblock-type 2 [Homo sapiens]	2.48444		16.67		2		5.48135
Q3MHD2	protein LSM12 homolog [Homo sapiens]	27.6073	2.15954	23.59	6.67	4	1	5.43105	1.67419
O00233	26S proteasome non-ATPase regulatory subunit 9 isoform 1 [Homo sapiens]	6.84894	5.92458	8.52	4.04	2	1	5.42942	1.0538
O75396	vesicle-trafficking protein SEC22b precursor [Homo sapiens]	2.78835		6.51		1		5.41485
P55209	nucleosome assembly protein 1-like 1 [Homo sapiens]	2.13278		4.35		1		5.37956
P67809	nuclease-sensitive element-binding protein 1 [Homo sapiens]	9.66921		17.28		3		5.3626
P51149	ras-related protein Rab-7a [Homo sapiens]	6.67831	2.13341	12.08	6.76	2	1	5.35896	0.86394
P82650	28S ribosomal protein S22, mitochondrial [Homo sapiens]	2.05043		3.33		1		5.35845
P62829	60S ribosomal protein L23 [Homo sapiens]	2.22854	6.82759	7.14	10.71	1	1	5.31735	0.0147123
P19338	nucleolin [Homo sapiens]	62.2966	27.0082	21.27	12.82	14	7	5.30092	1.00872
Q01130	serine/arginine-rich splicing factor 2 [Homo sapiens]	5.98963		3.62		1		5.29483
P63104	14-3-3 protein zeta/delta [Homo sapiens]	4.76632	6.68462	5.71	20	1	2	5.29005	0.0438176
P12004	proliferating cell nuclear antigen [Homo sapiens]	2.20993		4.98		1		5.26021
O60220	mitochondrial import inner membrane translocase subunit Tim8 A isoform 1 [Homo sapiens]	4.77419	6.20685	11.34	11.34	1	1	5.2484	0.97
P61956	small ubiquitin-related modifier 2 isoform b precursor [Homo sapiens]	8.29076		16.9		1		5.24452
Q06830	peroxiredoxin-1 [Homo sapiens]	7.51155		10.55		2		5.24179
P68371	tubulin beta-4B chain [Homo sapiens]	19.2372		14.61		3		5.21931
Q14444	caprin-1 isoform 2 [Homo sapiens]	6.25163	2.48346	4.9	1.59	2	1	5.21696	1.64157
P50502	hsc70-interacting protein [Homo sapiens]	6.84661		3.79		1		5.2058
Q9NRF9	DNA polymerase epsilon subunit 3 [Homo sapiens]	4.20673		9.52		1		5.17243
P26196	probable ATP-dependent RNA helicase DDX6 [Homo sapiens]	6.50447	4.46775	9.11	3.52	3	1	5.152	1.02784
Q8N983	39S ribosomal protein L43, mitochondrial isoform a [Homo sapiens]	11.0011		26.42		4		5.14827
P09651	heterogeneous nuclear ribonucleoprotein A1 isoform a [Homo sapiens]	4.29054	4.91334	5	5	1	1	5.1315	0.875288
Q13405	39S ribosomal protein L49, mitochondrial [Homo sapiens]	9.75553		16.27		2		5.10114
Q15738	sterol-4-alpha-carboxylate 3-dehydrogenase, decarboxylating [Homo sapiens]	11.578	5.84631	11.53	5.09	3	1	5.09541	1.04728
P37802	transgelin-2 isoform b [Homo sapiens]	3.44642		9.55		2		5.08034
P52815	39S ribosomal protein L12, mitochondrial [Homo sapiens]	7.11951	2.52539	18.18	6.06	3	1	5.07634	0.0579805
Q9H3N1	thioredoxin-related transmembrane protein 1 precursor [Homo sapiens]	4.44327		4.29		1		5.02193
Q01105	protein SET isoform 1 [Homo sapiens]	60.7298	28.6397	36.21	21.72	12	7	5.015	1.02895
P62491	ras-related protein Rab-11A isoform 2 [Homo sapiens]	5.88423		24.52		4		4.99517
P04406	glyceraldehyde-3-phosphate dehydrogenase isoform 2 [Homo sapiens]	118.544	388.865	19.11	31.74	2	6	4.96969	1.26166
P50990	T-complex protein 1 subunit theta [Homo sapiens]	9.19801	2.2748	6.2	1.82	3	1	4.93698	0.949865
P11441	ubiquitin-like protein 4A [Homo sapiens]	14.0906		22.93		4		4.93523
O14737	programmed cell death protein 5 [Homo sapiens]	2.83946		10.4		1		4.93085
P14314	glucosidase 2 subunit beta isoform 2 precursor [Homo sapiens]	4.0689	6.42094	3.81	1.9	2	1	4.92283	1.12586
P55036	26S proteasome non-ATPase regulatory subunit 4 [Homo sapiens]	2.59924		4.77		1		4.91522
Q99729	heterogeneous nuclear ribonucleoprotein A/B isoform b [Homo sapiens]	16.3627		16.49		4		4.91364
P22392	nucleoside diphosphate kinase B isoform a [Homo sapiens]	2.24191		17.76		2		4.91342
P19105	myosin regulatory light chain 12A [Homo sapiens]	16.5508	6.27378	18.71	5.85	3	1	4.90523	1.01593
P62263	40S ribosomal protein S14 [Homo sapiens]	15.995	9.56688	19.21	10.6	4	2	4.89857	0.963851
Q9BVC6	transmembrane protein 109 precursor [Homo sapiens]	7.52048	5.42224	4.94	4.94	1	1	4.88162	0.947147
Q9Y5L4	mitochondrial import inner membrane translocase subunit Tim13 [Homo sapiens]	8.32808		14.74		1		4.86809
P23284	peptidyl-prolyl cis-trans isomerase B precursor [Homo sapiens]	4.711		6.02		1		4.86056
Q8WWM7	ataxin-2-like protein isoform A [Homo sapiens]	154.679	74.6634	21.67	14.6	1	12	4.85668	1.01236
Q13162	peroxiredoxin-4 precursor [Homo sapiens]	2.25118		4.06		1		4.85663
Q99417	C-Myc-binding protein [Homo sapiens]	7.14772		13.59		2		4.85147
P60660	myosin light polypeptide 6 isoform 1 [Homo sapiens]	15.432	13.5495	18.54	12.58	2	2	4.82808	0.887396
P10809	60 kDa heat shock protein, mitochondrial [Homo sapiens]	65.5275	110.598	28.45	22.69	12	8	4.82303	0.799403
P16949	stathmin isoform a [Homo sapiens]	13.4118		30.2		4		4.81223
Q9Y265	ruvB-like 1 [Homo sapiens]	6.68714		7.68		3		4.79204
P84103	serine/arginine-rich splicing factor 3 [Homo sapiens]	8.33053	4.18476	18.29	5.49	2	1	4.78136	0.863032
P49006	MARCKS-related protein [Homo sapiens]	10.8834	17.2971	51.28	56.41	4	4	4.76741	0.837414
P61604	10 kDa heat shock protein, mitochondrial [Homo sapiens]	18.1392		58.82		5		4.7311
P30040	endoplasmic reticulum resident protein 29 isoform 1 precursor [Homo sapiens]	5.83219		3.83		1		4.70712
O60664	perilipin-3 isoform 3 [Homo sapiens]	3.62946	4.54888	7.35	4.03	2	1	4.7059	0.971876
P07237	protein disulfide-isomerase precursor [Homo sapiens]	2.79653		3.15		1		4.70211
Q9Y3B4	pre-mRNA branch site protein p14 [Homo sapiens]	4.55039		16		2		4.68111
C9JLW8	protein FAM195B [Homo sapiens]	74.6742	43.4072	63.92	63.92	7	6	4.67413	1.03517
Q13561	dynactin subunit 2 isoform 3 [Homo sapiens]	13.9743		7.23		3		4.66001
P38646	stress-70 protein, mitochondrial precursor [Homo sapiens]	36.007	4.93872	16.64	4.27	9	2	4.64207	1.05435
P62854	40S ribosomal protein S26 [Homo sapiens]	5.08575		20.87		2		4.62476
P06733	alpha-enolase isoform 1 [Homo sapiens]	9.20217	10.8387	7.14	8.76	2	2	4.61286	0.796491
Q9Y2Q9	28S ribosomal protein S28, mitochondrial [Homo sapiens]	2.8147	2.77173	5.35	5.35	1	1	4.60695	0.800978
O43399	tumor protein D54 isoform h [Homo sapiens]	10.334	7.34665	26.38	8.59	2	1	4.58716	0.9174
P62318	small nuclear ribonucleoprotein Sm D3 [Homo sapiens]	5.27628		7.94		1		4.54519
P14174	macrophage migration inhibitory factor [Homo sapiens]	2.12297		7.83		1		4.54048
O00264	membrane-associated progesterone receptor component 1 [Homo sapiens]	31.796	4.42214	38.97	7.18	7	1	4.53378	0.812745
Q12904	aminoacyl tRNA synthase complex-interacting multifunctional protein 1 isoform a precursor [Homo sapiens]	7.76547		9.29		2		4.53157
P0CW22	40S ribosomal protein S17-like [Homo sapiens]	2.65041		14.07		2		4.52786
P08238	heat shock protein HSP 90-beta isoform c [Homo sapiens]	15.1284	6.51742	4.9	5.18	3	3	4.5248	1.27542
P62841	40S ribosomal protein S15 [Homo sapiens]	4.553	23.1878	8.28	18.62	1	1	4.4973	1.56885
P22061	protein-L-isoaspartate(D-aspartate) O-methyltransferase isoform 3 [Homo sapiens]	35.0387		14		4		4.47219
O15347	high mobility group protein B3 [Homo sapiens]	3.9646		6.5		1		4.44936
P14625	endoplasmin precursor [Homo sapiens]	10.9157		4.23		3		4.44425
Q71U36	tubulin alpha-1A chain isoform 2 [Homo sapiens]	63.1463	38.1728	24.04	23.08	6	6	4.43354	0.845769
P06576	ATP synthase subunit beta, mitochondrial precursor [Homo sapiens]	14.0617		9.45		3		4.381
P07437	tubulin beta chain [Homo sapiens]	22.6286	22.7422	17.12	11.71	2	2	4.36375	0.869973
P05166	propionyl-CoA carboxylase beta chain, mitochondrial isoform 1 precursor [Homo sapiens]	5.16295		4.27		2		4.34152
P20674	cytochrome c oxidase subunit 5A, mitochondrial precursor [Homo sapiens]	2.22763		10		1		4.32354
P49756	RNA-binding protein 25 [Homo sapiens]	6.80872	2.55374	3.91	3.91	2	2	4.29403	0.783058
Q9GZT3	SRA stem-loop-interacting RNA-binding protein, mitochondrial isoform 3 precursor [Homo sapiens]	6.45646		10.87		1		4.29311
Q9Y2B0	protein canopy homolog 2 isoform 1 precursor [Homo sapiens]	3.96073		8.79		1		4.28114
P28066	proteasome subunit alpha type-5 isoform 1 [Homo sapiens]	4.84097		6.22		1		4.2769
P61978	heterogeneous nuclear ribonucleoprotein K isoform b [Homo sapiens]	5.00539		7.78		2		4.27687
Q8N183	mimitin, mitochondrial [Homo sapiens]	2.10215		11.83		1		4.27306
Q99614	tetratricopeptide repeat protein 1 [Homo sapiens]	14.3266	17.0403	12.67	5.82	3	2	4.27209	0.968801
P16989	Y-box-binding protein 3 isoform b [Homo sapiens]	4.32986		12.54		2		4.2714
410172476	PREDICTED: prothymosin alpha-like [Homo sapiens]	6.46374		12.84		1		4.26977
O75400	pre-mRNA-processing factor 40 homolog A [Homo sapiens]	4.92376		3.23		2		4.24747
P30050	60S ribosomal protein L12 [Homo sapiens]	4.42293		5.45		1		4.20942
P52292	importin subunit alpha-2 [Homo sapiens]	8.82694	5.38423	6.24	6.24	2	2	4.1967	0.727078
P61247	40S ribosomal protein S3a isoform 1 [Homo sapiens]	3.75789	21.5744	5.68	20.45	2	6	4.16219	0.915542
Q9BVA1	tubulin beta-2B chain [Homo sapiens]	13.4969		11.69		1		4.15715
Q16543	hsp90 co-chaperone Cdc37 [Homo sapiens]	2.42349		5.82		1		4.1456
Q9BX68	histidine triad nucleotide-binding protein 2, mitochondrial precursor [Homo sapiens]	2.36948		9.82		1		4.09428
P63173	60S ribosomal protein L38 [Homo sapiens]	2.0204		18.57		1		4.08576
O14602	eukaryotic translation initiation factor 1A, Y-chromosomal [Homo sapiens]	3.76162		6.94		1		4.07282
Q92665	28S ribosomal protein S31, mitochondrial [Homo sapiens]	2.47133		5.32		2		4.04936
P05387	60S acidic ribosomal protein P2 [Homo sapiens]	7.39485		39.13		2		4.00341
P11021	78 kDa glucose-regulated protein precursor [Homo sapiens]	95.0567	57.0082	26.91	20.03	13	10	3.97151	1.2401
P42704	leucine-rich PPR motif-containing protein, mitochondrial precursor [Homo sapiens]	2.20643		0.86		1		3.91909
P11279	lysosome-associated membrane glycoprotein 1 precursor [Homo sapiens]	2.9656	2.06202	2.64	2.64	1	1	3.888	0.733137
Q07812	apoptosis regulator BAX isoform sigma [Homo sapiens]	8.85901	2.19592	32.4	7.26	4	1	3.88121	1.11835
P11142	heat shock cognate 71 kDa protein isoform 2 [Homo sapiens]	44.922	26.3671	21.7	18.26	9	5	3.87173	1.0142
P30153	serine/threonine-protein phosphatase 2A 65 kDa regulatory subunit A alpha isoform [Homo sapiens]	2.23687		1.7		1		3.85861
Q99536	synaptic vesicle membrane protein VAT-1 homolog [Homo sapiens]	6.3958		7.63		2		3.85217
Q5ZPR3	CD276 antigen isoform a precursor [Homo sapiens]	2.54635		4.87		1		3.84505
P62310	U6 snRNA-associated Sm-like protein LSm3 [Homo sapiens]	2.20806		11.76		1		3.81668
P27824	calnexin precursor [Homo sapiens]	5.58869		3.72		2		3.79551
Q14103	heterogeneous nuclear ribonucleoprotein D0 isoform d [Homo sapiens]	6.06849		8.36		1		3.77661
Q32MZ4	leucine-rich repeat flightless-interacting protein 1 isoform 1 [Homo sapiens]	4.47275		5		2		3.76487
Q8N726	cyclin-dependent kinase inhibitor 2A isoform p12 [Homo sapiens]	4.51372		14.66		1		3.75956
Q92734	protein TFG isoform 2 [Homo sapiens]	12.4372	3.71665	14.14	11.62	3	2	3.74334	0.76173
P08107	heat shock 70 kDa protein 1A/1B [Homo sapiens]	58.6044	42.6496	17.94	12.95	10	6	3.70943	0.978722
P04075	fructose-bisphosphate aldolase A isoform 1 [Homo sapiens]	3.48575		3.85		1		3.67505
Q9HAV7	grpE protein homolog 1, mitochondrial precursor [Homo sapiens]	10.4752		15.21		4		3.66475
Q14974	importin subunit beta-1 isoform 1 [Homo sapiens]	8.93911		3.42		2		3.62823
Q13765	nascent polypeptide-associated complex subunit alpha isoform b [Homo sapiens]	4.17416		6.98		1		3.62516
Q9UN86	ras GTPase-activating protein-binding protein 2 isoform b [Homo sapiens]	9.2194		2.9		1		3.6229
P63261	actin, cytoplasmic 2 [Homo sapiens]	12.2254	27.8652	12	20.8	3	4	3.56463	0.66506
Q9Y5M8	signal recognition particle receptor subunit beta [Homo sapiens]	2.29814	4.52954	7.01	5.9	1	2	3.53712	1.09004
P0CG47	polyubiquitin-B precursor [Homo sapiens]	17.6121		60.26		4		3.37769
P16403	histone H1.2 [Homo sapiens]	5.39525		5.63		1		3.34582
Q71DI3	histone H3.2 [Homo sapiens]	35.0248	169.998	23.53	23.53	1	1	3.31399	0.832452
P05556	integrin beta-1 isoform 1A precursor [Homo sapiens]	2.22277		2.13		1		3.29167
P21964	catechol O-methyltransferase isoform S-COMT [Homo sapiens]	5.44806	2.26781	5.43	5.43	1	1	3.28567	0.58129
Q9Y605	MORF4 family-associated protein 1 isoform b [Homo sapiens]	2.62503		23.3		1		3.25173
Q01844	RNA-binding protein EWS isoform 4 [Homo sapiens]	2.37867	3.85624	2.33	2.33	1	1	3.22962	0.988687
Q96CP2	FLYWCH family member 2 [Homo sapiens]	4.09659		21.43		2		3.20835
P62277	40S ribosomal protein S13 [Homo sapiens]	4.79752		7.95		1		3.17923
P29692	elongation factor 1-delta isoform 4 [Homo sapiens]	5.82807		11.67		3		3.08338
Q13283	ras GTPase-activating protein-binding protein 1 [Homo sapiens]	18.4513	2.1439	16.31	6.22	6	2	3.08311	1.15934
Q9BTA9	WW domain-containing adapter protein with coiled-coil isoform 3 [Homo sapiens]	2.15093		4.6		1		3.05879
P05388	60S acidic ribosomal protein P0 [Homo sapiens]	2.02384		3.15		1		3.05813
Q9Y6H1	coiled-coil-helix-coiled-coil-helix domain-containing protein 2, mitochondrial precursor [Homo sapiens]	6.00021	2.00919	18.54	18.54	1	1	2.94221	0.532228
Q969G3	SWI/SNF-related matrix-associated actin-dependent regulator of chromatin subfamily E member 1 [Homo sapiens]	4.17216		6.81		2		2.9305
Q8WVC6	dephospho-CoA kinase domain-containing protein [Homo sapiens]	14.0289	13.1916	5.19	5.19	2	2	2.23773	0.875002
O94766	galactosylgalactosylxylosylprotein 3-beta-glucuronosyltransferase 3 [Homo sapiens]	2.02667		5.67		2			91.74
Q7Z7K0	COX assembly mitochondrial protein homolog [Homo sapiens]	2.57633		9.43		1			91.74

## Sheet: #4 vs mock
SILAC AP-MS/MS Influenza B virus mutant #4 vs non-infected (mock)
UniProt Accession Number	Description	Score Replicate 1	Score Replicate 2	Coverage Replicate 1	Coverage Replicate 2	# Unique Peptides Replicate 1	# Unique Peptides Replicate 2	Ratio mutant #4/ mock infection replicate 1	Ratio mutant #4/ mock infection replicate 2
Q7Z7K0	COX assembly mitochondrial protein homolog [Homo sapiens]		2.57633		9.43		1		182.5
O94766	galactosylgalactosylxylosylprotein 3-beta-glucuronosyltransferase 3 [Homo sapiens]		2.02667		5.67		2		112.465
Q8NBB4	SCAN domain-containing protein 1 isoform 1 [Homo sapiens]		2.99684		15.08		1		86.6714
Q3MHD2	protein LSM12 homolog [Homo sapiens]	27.6073	2.15954	23.59	6.67	4	1	1.1182	6.16333
Q14444	caprin-1 isoform 2 [Homo sapiens]	6.25163	2.48346	4.9	1.59	2	1	1.26286	3.87418
P23434	PREDICTED: glycine cleavage system H protein, mitochondrial-like [Homo sapiens]	5.34505	6.19907	17.34	15.61	2	2	1.26845	3.3406
P05386	60S acidic ribosomal protein P1 isoform 1 [Homo sapiens]		4.81002		14.04		1		3.07908
P08865	40S ribosomal protein SA [Homo sapiens]		2.40691		5.76		1		2.8811
O00233	26S proteasome non-ATPase regulatory subunit 9 isoform 1 [Homo sapiens]	6.84894	5.92458	8.52	4.04	2	1	0.909714	2.83478
O43175	D-3-phosphoglycerate dehydrogenase [Homo sapiens]	23.5608	6.40886	10.69	4.88	5	2	0.985908	2.82776
P05455	lupus La protein [Homo sapiens]	7.14663	2.05896	6.86	3.19	2	1	1.10134	2.81513
P82979	SAP domain-containing ribonucleoprotein [Homo sapiens]		5.99764		9.05		2		2.72693
Q8NC51	plasminogen activator inhibitor 1 RNA-binding protein isoform 4 [Homo sapiens]	2.95532	10.5509	5.43	5.43	1	2	1.10041	2.71562
Q9Y230	ruvB-like 2 [Homo sapiens]	7.40252	5.83186	4.97	2.38	2	1	1.09302	2.68421
P25398	40S ribosomal protein S12 [Homo sapiens]	14.1519	2.20205	24.24	7.58	4	1	1.29653	2.64403
Q04837	single-stranded DNA-binding protein, mitochondrial precursor [Homo sapiens]	26.4324	2.30123	29.73	10.14	4	1	0.976254	2.609
P62750	60S ribosomal protein L23a [Homo sapiens]	19.1905	22.5138	10.9	10.9	2	2	1.22004	2.59808
P62857	40S ribosomal protein S28 [Homo sapiens]	12.0927	2.33479	47.83	17.39	4	1	1.19711	2.55914
Q12874	splicing factor 3A subunit 3 [Homo sapiens]		2.35624		2.4		1		2.52375
P55327	tumor protein D52 isoform 3 [Homo sapiens]	17.6665	8.67386	27.72	27.17	2	2	1.09607	2.49747
Q01844	RNA-binding protein EWS isoform 4 [Homo sapiens]	2.37867	3.85624	2.33	2.33	1	1	0.742847	2.46149
P62191	26S protease regulatory subunit 4 [Homo sapiens]	6.53054	6.86753	4.77	2.73	2	1	1.0867	2.44906
P62258	14-3-3 protein gamma [Homo sapiens]		2.00059		8.91		1		2.43775
Q16629	serine/arginine-rich splicing factor 7 isoform 2 [Homo sapiens]		2.24032		3.98		1		2.3827
P49368	T-complex protein 1 subunit gamma isoform c [Homo sapiens]	8.02268	8.50415	2.17	2.17	1	1	1.12213	2.38179
P50990	T-complex protein 1 subunit theta [Homo sapiens]	9.19801	2.2748	6.2	1.82	3	1	0.936484	2.37896
O43399	tumor protein D54 isoform h [Homo sapiens]	10.334	7.34665	26.38	8.59	2	1	0.967117	2.37398
P09651	heterogeneous nuclear ribonucleoprotein A1 isoform a [Homo sapiens]	4.29054	4.91334	5	5	1	1	1.36543	2.33603
Q9UHV9	prefoldin subunit 2 [Homo sapiens]	13.406	2.05831	22.73	9.09	3	1	1.06427	2.3252
P14314	glucosidase 2 subunit beta isoform 2 precursor [Homo sapiens]	4.0689	6.42094	3.81	1.9	2	1	0.84692	2.27996
P19105	myosin regulatory light chain 12A [Homo sapiens]	16.5508	6.27378	18.71	5.85	3	1	1.03547	2.26728
Q15738	sterol-4-alpha-carboxylate 3-dehydrogenase, decarboxylating [Homo sapiens]	11.578	5.84631	11.53	5.09	3	1	0.967945	2.24168
P19338	nucleolin [Homo sapiens]	62.2966	27.0082	21.27	12.82	14	7	1.11596	2.23029
P61289	proteasome activator complex subunit 3 isoform 1 [Homo sapiens]		5.30444		5.91		1		2.22255
O60664	perilipin-3 isoform 3 [Homo sapiens]	3.62946	4.54888	7.35	4.03	2	1	0.965944	2.21759
O60220	mitochondrial import inner membrane translocase subunit Tim8 A isoform 1 [Homo sapiens]	4.77419	6.20685	11.34	11.34	1	1	1.10643	2.21333
P62263	40S ribosomal protein S14 [Homo sapiens]	15.995	9.56688	19.21	10.6	4	2	1.02179	2.17385
Q99614	tetratricopeptide repeat protein 1 [Homo sapiens]	14.3266	17.0403	12.67	5.82	3	2	1.02643	2.16617
P09496	clathrin light chain A isoform f [Homo sapiens]		6.50745		12.65		1		2.12428
Q9BVC6	transmembrane protein 109 precursor [Homo sapiens]	7.52048	5.42224	4.94	4.94	1	1	0.799606	2.11308
P84103	serine/arginine-rich splicing factor 3 [Homo sapiens]	8.33053	4.18476	18.29	5.49	2	1	0.863214	2.07725
P49756	RNA-binding protein 25 [Homo sapiens]	6.80872	2.55374	3.91	3.91	2	2	0.72296	2.06046
Q8WWM7	ataxin-2-like protein isoform A [Homo sapiens]	154.679	74.6634	21.67	14.6	1	12	0.919205	2.02811
Q96AG4	leucine-rich repeat-containing protein 59 [Homo sapiens]		2.26644		3.91		1		2.02474
P11142	heat shock cognate 71 kDa protein isoform 2 [Homo sapiens]	44.922	26.3671	21.7	18.26	9	5	1.06371	2.02391
Q01105	protein SET isoform 1 [Homo sapiens]	60.7298	28.6397	36.21	21.72	12	7	1.01416	2.02388
P22061	protein-L-isoaspartate(D-aspartate) O-methyltransferase isoform 1 [Homo sapiens]	35.0387	24.4669	14	23.51	4	5	0.939729	2.01671
P26196	probable ATP-dependent RNA helicase DDX6 [Homo sapiens]	6.50447	4.46775	9.11	3.52	3	1	1.23174	2.01204
Q13283	ras GTPase-activating protein-binding protein 1 [Homo sapiens]	18.4513	2.1439	16.31	6.22	6	2	0.922968	2.00355
P05166	propionyl-CoA carboxylase beta chain, mitochondrial isoform 1 precursor [Homo sapiens]	5.16295		4.27		2		9.60615
P60174	triosephosphate isomerase isoform 1 [Homo sapiens]	6.37817		10.44		2		9.35577
